# Supplementary material for: Effectiveness of virtual reality on activities of daily living in children with cerebral palsy: a systematic review and meta-analysis
Source: PeerJ. 2023 Aug 31;11:e15964. doi: 10.7717/peerj.15964 (PMC10475275; doi:10.7717/peerj.15964)
Supplement: Supplemental Information 1 [file peerj-11-15964-s001.xlsx]

## Sheet: effect size coding
			experimental					control
				pre		post			pre		post
No.	Study	Outcome	N	Mean	SD	Mean	SD	N	Mean	SD	Mean	SD
1	Reid and Campbell. (2006)	SPPC-SC	19	2.84	0.77	2.92	0.79	12	2.7	0.59	2.92	0.79
	Reid and Campbell. (2006)	SPPC-SA	19	3.01	0.8	3.2	0.65	12	3.35	0.71	3.2	0.65
	Reid and Campbell. (2006)	SPPC-AC	19	2.38	0.76	2.65	0.67	12	2.48	0.52	2.65	0.67
	Reid and Campbell. (2006)	SPPC-PA	19	3.45	0.59	3.71	0.45	12	3.16	0.51	3.71	0.45
	Reid and Campbell. (2006)	SPPC-BC	19	3.44	0.48	3.53	0.51	12	3.05	0.61	3.53	0.51
	Reid and Campbell. (2006)	SPPC-GSW	19	3.38	0.7	3.65	0.5	12	3.29	0.52	3.65	0.5
	Reid and Campbell. (2006)	QUEST	19	67.68	28.87	71.19	28.83	12	42.71	35.31	71.19	28.83
	Reid and Campbell. (2006)	COPM-P	19	3.35	0.84	5.83	1.7	12	3.8	1.3	5.07	1.9
	Reid and Campbell. (2006)	COPM-S	19	3.89	1.1	6.58	1.5	12	4.2	1.5	6.02	2.33
2	Rostami et al. (2012)	PMAL (Amount of use)	8	0.66	0.37	2.37	0.45	8	0.74	0.24	2.54	0.51
	Rostami et al. (2012)	PMAL (Quality of movement)	8	0.53	0.31	2.26	0.24	8	0.59	0.28	2.21	0.19
	Rostami et al. (2012)	BOTMP	8	0.25	0.06	1.22	0.23	8	0.18	0.09	1.35	0.37
3	James et al. (2015)	AMPS-M	51	1.06	0.56	1.38	0.44	50	1.14	0.5	1.11	0.48
	James et al. (2015)	AMPS-P	51	1.05	0.48	1.39	0.34	50	1.15	0.54	1.08	0.53
	James et al. (2015)	JTTHF (Non-dominant)	51	201.56	181.93	173.09	197.18	50	216.24	187.11	197.18	171.3
	James et al. (2015)	JTTHF (Dominant)	51	40.65	9.92	35.85	7.14	50	42.48	20.67	43.76	19.16
	James et al. (2015)	AHA	51	66.68	16.59	68.24	15.32	50	66.06	16.42	67.84	15.41
	James et al. (2015)	MUUL	51	83.01	17.96	82.94	17.92	50	81.3	16.99	80.49	16.74
	James et al. (2015)	COPM-P	51	4.15	1.37	6.26	1.69	50	4.22	1.29	4.98	1.39
	James et al. (2015)	COPM-S	51	4.59	1.45	6.67	1.92	50	4.58	1.76	5.16	1.69
	James et al. (2015)	TVPS-3 Total	51	85.05	16.07	92.55	17.6	50	84.54	17.7	83.72	18.48
	James et al. (2015)	TVPS-3 Visual discrimination	51	7.59	3.35	9.38	3.51	50	7.9	3.37	8.29	3.6
	James et al. (2015)	TVPS-3 Visual memory	51	9.71	3.34	10.72	3.7	50	9.52	3.86	9.31	4.89
	James et al. (2015)	TVPS-3 Spatial relations	51	11.1	4.04	12.36	3.35	50	10.46	4.68	10.33	4.25
	James et al. (2015)	TVPS-3 Form constancy	51	7.06	3.64	8.32	3.86	50	6.5	4.04	6.69	4.02
	James et al. (2015)	TVPS-3 Sequential memory	51	8.28	3.66	9.92	3.33	50	8.78	3.94	8.91	3.85
	James et al. (2015)	TVPS-3 Figure ground discrimination	51	7.8	4	8.72	4.57	50	7.88	4.43	7.56	4.37
	James et al. (2015)	TVPS-3 Visual closure	51	6.65	4.42	8.4	4.31	50	6.44	4.31	6.69	4.87
4	Atasavun Uysal and Baltaci. (2016)	PEDI Self-care	12	62.08	13.25	64.08	12.92	12	67.5	9.93	69.5	9.14
	Atasavun Uysal and Baltaci. (2016)	PEDI Mobility	12	53.84	5.3	55.75	4.07	12	57.67	2.18	58.5	1.56
	Atasavun Uysal and Baltaci. (2016)	PEDI Social	12	59.4	7.27	60.67	6.65	12	64	2.55	64.91	0.28
	Atasavun Uysal and Baltaci. (2016)	PEDI Total	12	175.2	22.2	180.5	19.92	12	189.16	12.05	192.91	10.43
	Atasavun Uysal and Baltaci. (2016)	COPM-P	12	6.24	2.1	7.33	1.87	12	5.08	2.62	5.23	2.88
	Atasavun Uysal and Baltaci. (2016)	COPM-S	12	4.97	1.5	5.5	1.62	12	3.55	3.26	5	2.82
	Atasavun Uysal and Baltaci. (2016)	PBS	12	54.08	1.44	55.75	0.45	12	53.66	1.87	53.91	1.62
5	Acar et al. (2016)	QUEST Dissociated movement	15	80.1	7.73	85.6	8.54	15	81.4	10.7	86.4	8.78
	Acar et al. (2016)	QUEST Grrasps	15	42.2	18.76	47.1	16.64	15	53	16.45	55.7	15.3
	Acar et al. (2016)	QUEST Weight bearing	15	69.2	19.46	72.7	19.6	15	75.4	17.07	77.3	15.43
	Acar et al. (2016)	QUEST Protective extension	15	72.9	14.78	77	12.66	15	71	23.52	74	23.36
	Acar et al. (2016)	JTHFT	15	40.4	16.44	32.9	14.88	15	31.5	9.57	29.9	8.83
	Acar et al. (2016)	ABILHAND-Kids	15	0.56	2.34	1.33	2.04	15	1.07	1.9	1.51	1.7
	Acar et al. (2016)	WeeFIM (Self-care)	15	46	8.23	46.7	7.51	15	48.3	7.27	48.9	7.14
6	Mitchell et al. (2016)	Functional strength composite	51	43.7	22.3	63.5	26	50	47.6	20.8	46.8	18.3
	Mitchell et al. (2016)	Sit-to-stand	51	12.4	3.9	15.3	4.4	50	12.7	3.7	12.7	3.1
	Mitchell et al. (2016)	Lateral step (Dominant)	51	13.3	7.4	19.4	8	50	13.8	6.2	14.1	5.4
	Mitchell et al. (2016)	Lateral step (Non dominant)	51	12	7.9	18.5	8.1	50	11.9	6.7	12.1	5.5
	Mitchell et al. (2016)	Half-kneel (Dominant)	51	3.3	3.5	5.6	5.5	50	4.7	4.8	4.2	4.1
	Mitchell et al. (2016)	Half-kneel (Non dominant)	51	2.5	3.1	4.5	4.9	50	3.8	4.4	3.6	4.6
	Mitchell et al. (2016)	6MWT	51	366	70.8	404.4	68.9	50	382	85.8	374	64.9
	Mitchell et al. (2016)	Counts/minute	48	432	151	419	199	46	436	179	419	158
	Mitchell et al. (2016)	Step counts	48	7775	2416	7558	3404	46	7641	3164	6961	2530
	Mitchell et al. (2016)	Wear time	48	11.36	1.18	11.23	1.38	46	11.34	1.3	11.19	1.54
	Mitchell et al. (2016)	Time sedentary	48	8.35	0.48	8.36	1	46	8.38	1.03	8.48	0.53
	Mitchell et al. (2016)	Time light	48	2.39	0.38	2.35	0.43	46	2.36	0.47	2.34	0.4
	Mitchell et al. (2016)	Time MVPA	48	0.44	0.17	0.43	0.25	46	0.44	0.2	0.42	0.18
	Mitchell et al. (2016)	Weakend sedentary	42	8.36	1.07	8.37	1.28	36	8.38	1.19	8.54	0.56
	Mitchell et al. (2016)	Weekend light	42	2.41	0.5	2.48	1.3	36	2.38	0.57	2.37	0.42
	Mitchell et al. (2016)	Weekend MVPA	42	0.41	0.24	0.41	0.25	36	0.42	0.29	0.36	0.18
	Mitchell et al. (2016)	Weekday sedentary	48	8.36	0.48	8.38	1.12	46	8.38	1.19	8.54	0.56
	Mitchell et al. (2016)	Weekday light	48	2.36	0.38	2.34	0.55	46	2.35	0.44	2.24	0.41
	Mitchell et al. (2016)	Weekday MVPA	48	0.47	0.18	0.49	0.28	46	0.45	0.18	0.48	0.18
	Mitchell et al. (2016)	MobQues28	49	89.4	10.9	90.8	9.4	50	90.5	7.7	90.4	11.4
	Mitchell et al. (2016)	LIFE-H recreation	46	7.5	2.36	8	2.3	48	7.6	2.34	7.4	2.5
7	Tarakci et al. (2016)	Will age	15	47.8	7.51	41.53	8.25	15	48.6	6.24	47.4	6.15
	Tarakci et al. (2016)	Ski slalom	15	9.73	1.7	15.46	2.61	15	14.06	3.3	14.4	3.81
	Tarakci et al. (2016)	Soccer heading	15	14.53	3.94	23.93	6.41	15	15.46	5.56	17.26	5.25
	Tarakci et al. (2016)	Tilt table	15	14.13	6.19	28.33	11.44	15	12.2	5.11	15.4	6.56
	Tarakci et al. (2016)	Walking a tightrope	15	1.33	0.22	2.35	0.34	15	1.41	0.53	1.65	0.75
	Tarakci et al. (2016)	STS	15	6.13	1.55	8.73	2.08	15	5.6	1.5	6.13	1.68
	Tarakci et al. (2016)	10SCT	15	10.32	3.81	8.42	3.57	15	12.03	4.91	11.12	4.27
	Tarakci et al. (2016)	10MWT	15	13.25	3.56	11.04	3.46	15	13.77	4.72	12.96	4.64
	Tarakci et al. (2016)	TUG	15	12.96	3.65	10.62	3.3	15	15.77	4.52	14.67	4.54
	Tarakci et al. (2016)	Will balance	15	1.59	0.31	2.73	0.41	15	1.16	0.71	1.25	0.72
	Tarakci et al. (2016)	FRT F	15	20.33	5.89	24.6	6.83	15	18	8.29	19.2	8.53
	Tarakci et al. (2016)	FRT L	15	15.26	6.01	18.46	6.78	15	15.46	4.08	16.13	4.12
	Tarakci et al. (2016)	FRT R	15	16.06	4.75	19.66	5.8	15	15.26	5.45	16.2	5.21
	Tarakci et al. (2016)	WeeFIM (Total)	15	95.73	10.1	100.26	8.75	15	94.4	10.7	95.5	10.47
	Tarakci et al. (2016)	WeeFIM (Self-care)	15	31.46	4.29	32.6	3.73	15	30.53	6.85	30.93	6.81
	Tarakci et al. (2016)	WeeFIM (Transfers)	15	16.06	2.96	16.46	2.77	15	16.6	2.84	16.66	2.82
	Tarakci et al. (2016)	WeeFIM (Locomotion)	15	9.66	1.34	11.6	0.73	15	9.33	1.83	10	1.77
8	Avcil et al. (2020)	MMDT (Non-dominant)	15	508.82	303.34	346.53	188.19	15	450.93	447.51	385.73	412.27
	Avcil et al. (2020)	MMDT (Dominant)	15	392.46	161.58	295.33	125.15	15	390.66	285.05	319.8	256.64
	Avcil et al. (2020)	Grip strength (Non-dominant)	15	13.17	9.2	15.85	8.92	15	11.57	6.47	14.53	7.34
	Avcil et al. (2020)	Grip strength (Dominant)	15	7.88	4.17	9.96	5.35	15	9.55	5.79	11.54	6.82
	Avcil et al. (2020)	Tip grip (Non-dominant)	15	0.63	0.34	2.86	1.43	15	0.41	0.54	2.66	1.15
	Avcil et al. (2020)	Tip grip (Dominant)	15	1.31	0.77	1.71	0.78	15	1.77	1.04	2.11	1.04
	Avcil et al. (2020)	Lateral grip (Non-dominant)	15	4.32	2.65	5.13	3.09	15	5.3	1.51	4.43	1.66
	Avcil et al. (2020)	Lateral grip (Dominant)	15	2.49	1.61	3.22	2.05	15	2.8	1.16	3.65	1.51
	Avcil et al. (2020)	Triple girp (Non-dominant)	15	3.56	2.45	4.18	2.82	15	2.75	1.11	3.31	1.37
	Avcil et al. (2020)	Triple grip (Dominant)	15	1.63	1.09	2.33	1.56	15	2.29	1.22	2.8	1.43
	Avcil et al. (2020)	CHAQ Dressing	15	2.87	0.74	2.27	0.88	15	3.07	0.45	2.2	0.56
	Avcil et al. (2020)	CHAQ Arising	15	0.6	0.98	0.47	0.91	15	1.87	1.24	1.8	1.2
	Avcil et al. (2020)	CHAQ Eating	15	1.87	0.99	1.27	0.79	15	2.4	0.73	1.27	0.7
	Avcil et al. (2020)	CHAQ Walking	15	0.87	1.24	0.73	1.22	15	2.27	1.28	2.27	1.28
	Avcil et al. (2020)	CHAQ Hygiene	15	2.33	1.04	2	1	15	2.73	0.45	2.27	0.79
	Avcil et al. (2020)	CHAQ Reach	15	1.4	0.91	1	0.75	15	2.13	0.99	1.6	0.91
	Avcil et al. (2020)	CHAQ Grip	15	1.73	0.7	1.27	0.7	15	1.53	0.99	1.07	0.59
	Avcil et al. (2020)	CHAQ Activity	15	2.07	1.22	2	1.25	15	2.53	1.06	2.53	1.06
	Avcil et al. (2020)	CHAQ General	15	47.67	18.21	38.47	18.05	15	43.8	12.59	35.4	11.13
	Avcil et al. (2020)	CHAQ Total	15	1.7	0.57	1.37	0.54	15	2.31	0.67	1.87	0.68
	Avcil et al. (2020)	DHI	15	42	14.05	32.8	13.25	15	36.07	14.31	29.6	12.25
9	Choi et al. (2021)	MA-2 (Range)	40	54.72	4.02	61.48	3.62	38	54.78	4.13	58.77	3.72
	Choi et al. (2021)	MA-2 (Accuracy)	40	60.8	4.63	68.7	4.08	38	60.63	4.75	66.84	4.19
	Choi et al. (2021)	MA-2 (Dexterity)	40	50.09	3.75	60.17	3.53	38	52.08	3.85	55.72	3.62
	Choi et al. (2021)	MA-2 (Fluency)	40	45.6	3.77	51.91	3.53	38	43.62	3.86	47.49	3.62
	Choi et al. (2021)	ULPRS Total score	40	13.05	1.13	14.67	1.02	38	13.29	1.16	14.66	1.05
	Choi et al. (2021)	PEDI ADL	40	47.2	0.71	49.35	0.53	38	48.05	0.72	48.84	0.54
	Choi et al. (2021)	PEDI Mobility	40	55.8	0.96	56.7	0.95	38	56.95	0.98	56.95	0.98
	Choi et al. (2021)	PEDI Social cognitive	40	63.05	0.51	63.9	0.48	38	63.32	0.53	63.87	0.49
	Choi et al. (2021)	PEDI Responsibility	40	44.93	0.82	45.78	0.69	38	44.92	0.84	45.53	0.71
10	Jha et al. (2021)	PBS	19	38.7	6	43.8	6.1	19	36.7	6.1	40.2	5.4
	Jha et al. (2021)	KIDs-Mini Best	19	9.9	3.4	18.6	3.6	19	8.9	2.7	14.7	3.1
	Jha et al. (2021)	GMFM 88	19	81.9	5.2	88.9	6.9	19	80.6	4.9	86.6	5.1
	Jha et al. (2021)	WeeFIM (Total)	19	86.8	12.3	95.2	12.9	19	86.7	11.4	89.5	14.2
11	Wang e tal. (2022)	BOTMP	10	7.11	4.7	9	5.57	10	7.44	4.45	10.78	5.43
	Wang e tal. (2022)	ABILHAND-Kids	10	1.76	0.56	2.4	1.21	10	1.41	0.86	1.34	0.67
	Wang e tal. (2022)	PMAL (How often)	10	1.76	0.56	1.96	0.94	10	1.41	0.86	1.34	0.67
	Wang e tal. (2022)	PMAL (How well)	10	2.32	0.59	2.26	0.84	10	1.76	1.37	1.59	0.86
	Wang e tal. (2022)	WeeFIM (Total)	10	70	40.44	73.33	44.88	10	67.78	36.24	84.44	35.55
	Wang e tal. (2022)	PSI-SF	10	129.25	11.68	127.88	23.61	10	134.56	20.31	137.11	17.56
	Wang e tal. (2022)	TOP	10	0.31	0.77	0.8	0.81	10	0.25	0.78	1.22	0.72

## Sheet: median
Estimating the sample mean and standard deviation
Scenario 1 (minimum, median, maximum, sample size)
Input							Mean Estimation				Standard Deviation Estimation
	Minimum	Median	Maximum	Sample Size			Our method	Hozo's Method			Our method	Hozo's Method
	0	3	11	7			4.25	4.25			4.03081	3.2564
Scenario 2 (minimum, the first quartile, median, the third quartile, maximum, sample size)
Input							Mean Estimation				Standard Deviation Estimation
Minimum	First quartile	Median	Third quartile	Maximum	Sample Size		Our method		Bland's Method		Our method		Bland's Method
0.01	0.02	0.03	0.04	0.05	100		0.03		0.03		0.0115243		0.0111803
Scenario 3 (the first quartile, median, the third quartile, sample size)
Input							Mean Estimation				Standard Deviation Estimation
	First quartile	Median	Third quartile	Sample Size			Our method				Our method
	4	4.7	5.4	45			4.7				1.07212
Readme
1. Choose the scenario according to available summary statistics.
2. Input the summary statistics in the corresponding fields
3. The embeded formula will automatically estimate the mean and standard deviation.
